# Supplementary material for: Nuclear factor interleukin 3 and metabolic dysfunction-associated fatty liver disease development
Source: Research Square preprint supplement (doi:10.21203/rs.3.rs-3266425/v1), 2023-09-18
Supplement: Supplementary file 1 [file 8a1c88045e7e86a8e0236b19.docx]

**Supplementary Materials for**

**Nuclear factor interleukin 3 and metabolic dysfunction-associated fatty liver disease development**

**The PDF file includes:**

**Extended Methods**

**Figs. S1 to S7**

Figure S1. Sex-specific physiology in high-fat diet (HFD)-fed wild type (WT) and *Nfil3*-deficient (NKO) mice.

Figure S2. Effects of High-fat diet (HFD) on adipose tissue shape and weight in male and female wild type (WT) and *Nfil3*-deficient (NKO) mice.

Figure S3. High-fat diet (HFD)-induced changes in the immune profile of male and female wild type (WT) and *Nfil3*-deficient (NKO) mice.

Figure S4. A high-fat diet (HFD) alters the gut length, colon length, and immunological profile of male and female wild type (WT) and *Nfil3*-deficient (NKO) mice.

Figure S5. Gut microbiota-bile acid (GM-BA) correlations in high-fat diet (HFD)-fed male and female wild type (WT) and *Nfil3*-deficient (NKO) mice.

Figure S6. Gut microbiota (GM) in normal chow diet (NCD)/high-fat diet (HFD)-fed male and female wild type (WT) and *Nfil3*-deficient (NKO) mice.

Figure S7. Ileal bile acid (BA) transfer in high-fat diet (HFD)-fed male and female wild type (WT) and *Nfil3*-deficient (NKO) mice.

**Extended Methods**

**Patient specimens**

Human peripheral blood mononuclear cells (PBMCs) samples were obtained from healthy volunteers and patients with obesity, including men and women were recruited and classified into two groups depending on their body mass index (BMI). A non-obesity group (BMI < 25 kg/m2) was composed of 5 volunteers and an overweight-obese group (BMI ≥ 25 kg/m2) of 10 volunteers (5 women and 5 men). The inclusion criteria were: subjects aged 18–45 years old, with no chronic disease who did not take regular medication or drugs. To avoid potential bias, both groups included approx. 50% men/women and there was no difference in their average age. The number of individuals has been calculated to provide an 80% power and to detect a difference of 10% in BMI, with a p < 0.05. Informed consent in writing was obtained from all the patients and volunteers before inclusion in this study. The study protocol conformed to the ethical guidelines and was approved by the Clinical Research Ethics Committee of the Taipei Veterans General Hospital Human Ethics Committee accepted this research (protocol B-BR-108-018-T) on obesity.

**Fasting Blood Glucose and Oral Glucose Tolerance Test (OGTT)**

Fasting glucose levels were measured every four weeks. After a 14 h fast, blood glucose levels were determined from blood collected from a tail incision (0 min data) using test strips and a Taiwanese Super OK meter. The OGTT was performed at 20 weeks. A 25% glucose solution (1 g/kg) was supplied to the mice via a gavage catheter. Blood glucose levels were monitored at 15, 30, 60, and 120 min using incision-site blood glucose strips.

**Biochemistry**

Blood samples were tested using the glucose meter Contour®Plus (Ascensia Diabetes Care, Basel, Switzerland) immediately after blood collection. Hepatocellular disintegration and necrosis were assessed spectrophotometrically in serum samples using aspartate aminotransferase (AST) and alanine transaminase (ALT). Cobas®c111Analyzer (Roche Diagnostics GmbH, Penzberg, Germany) recorded 340/378 nm extinction. Plasma tryglyceride (TG) levels were determined using a TG Colorimetric Assay Kit (Nr.:10010303, Cayman Chemical Company, Hamburg, Germany), according to the manufacturer’s instructions.

**Histological Analysis**

The histopathological organs were stored in 4% paraformaldehyde (PFA) after euthanasia. Tissues were dehydrated in 30%, 50%, 70%, and 90% alcohol for 2 h overnight and in 99% alcohol twice for 2 h. Xylene was used for 30–60 min (product code: 10291531; J.T. Backer, Sweden). After the tissues became translucent, xylene was removed, and paraffin was infiltrated overnight. The tissues were then embedded in paraffin. The paraffin-embedded tissues were cut into 5µm square sections using a Microtome (OS-315 Rotary; U.K.). The samples were then subjected to an alcohol gradient of 100% for 7 min (twice) and 95% for 7 min. The samples were then left to hydrate for 5 min and washed for 1 min. After staining, the tissue samples were air-dried. Liver tissues were incubated overnight in PFA to obtain frozen sections. After 2 h or overnight incubation, the tissues were treated with an optimum cutting temperature (OCT) chemical (Avantor, Cat 25608-930). Flash-frozen OCT-embedded tissues were frozen at -80°C.

**Hematoxylin and Eosin (H&E) Staining**

H&E staining was used to examine the tissue nuclei and cytoplasm. Tissue samples were stained with hematoxylin for 1–2 min before washing. Next, they were soaked in eosin dye for 30–60 s before being rinsed under running water (the staining duration varied per tissue). Pure ethanol was then used to lighten the samples, which were consequently observed by microscopy.

**Picrosirius Red Staining (PRS)**

PSR was used to observe fibrosis. Picrosirius red (Micro-Sirius Red, Abcam, ab150681) was applied to the tissue samples for 60 min. They were rinsed twice with acetic acid and again with pure alcohol and microscopically observed.

**Alcian Blue-Periodic Acid-Schiff Staining (Ab/PAS)**

Alcian Blue 8GX (Sigma, A5268-10G) dye was used to clean the tissue samples for 15 min. After 5 min, the color of the Periodic Acid (Abcam, ab150680) was removed. Schiff's solution was used to rinse the samples for 5–10 min. Hematoxylin-stained cell nuclei were washed after 2–3 min and observed by microscopy (Nexcope NE 910, U.S.A).

**Red O Oil Staining**

Frozen sections were colored, and the OCT was dissolved in frozen tissue slices in PBS and washed with 60% isopropanol (3:1). After 15 min, the slides were stained with Oil Red O working solution (#O0625; stock:ddH2O = 3:2; Sigma) and washed with 60% isopropanol. After hematoxylin staining of the cell nuclei, the transparent samples were rinsed and air-dried.

**RNA Extraction**

TRIzol (Invitrogen, Carlsbad, CA, USA) (100 µL/0.01 g) was added to intestinal or hepatic tissue. After shearing, a pulverizing device was used to homogenize the tissues and carefully combine them with 100% ethanol. The sample was then centrifuged for 1 min at 12,000 ×*g* and 4°C and the supernatant transferred to a column. RNA was isolated using Direct-zol RNA MiniPrep (ZYMO RESEARCH, R2050). A Nanodrop was used to measure the RNA concentration, and an agarose gel was run at 90 V for 20 min. The RNA was then maintained at -80°C.

**Complementary DNA (cDNA) Transcription**

Nuclease-free water was used to modify and normalize RNA concentrations in the samples. A reverse transcription buffer was prepared using high-capacity cDNA reverse transcription reagent kit (ThermoFisher, 4374966). A Bio-Rad T100TM thermal cycler was used to facilitate cDNA transcription. The sample temperature was maintained at -20°C.

**Quantitative Reverse Transcription Polymerase Chain Reaction (qRT-PCR)**

Total RNA isolation and RT-PCR were conducted using the manufacturer's instructions. The results were calculated using Ct values and normalized to *GAPDH* mRNA levels. The primer sequences are shown in Supplementary **Table S1**. After the experimental procedure, statistical analyses were performed based on the calculated Ct values.

**Immunoblot Analyses and Antibodies**

Western blotting was performed using standard methods. The following antibodies were used: anti-β-actin (Cell Signaling Technology, 3700), anti-phospho-AMPKα (Cell Signaling Technology, 2535), anti-AMPK (Santa Cruz, sc-25792), anti-PPARγ (Santa Cruz, sc-7273), and anti-FXR (Cell Signaling Technology, 72105).

**Flow Cytometry and Liver and Spleen-Infiltrating Leukocyte Isolation**

The liver was perfused with Hank’s balanced salt solution (HBSS [II]) until blood was completely cleared from the portal vein. An infusion of 0.05% collagenase (SI-C5138; Sigma Aldrich) was administered to soften the liver. After removing the liver, the tissue was shredded and submerged in a collagenase solution. A 50 mL centrifuge tube and a 70 µm filter were used to grind the liver and fluids. The tube was then filled with 50 mL PBS. Centrifugation was performed at 50 ×*g* for 5 min to separate non-parenchymal cells from hepatocytes. The supernatant containing NPCs was centrifuged at 3000g for 10 min and discarded, and 1 mL of RBC Lysing Buffer Hybri-MaxTM (Sigma Aldrich, #R7757-100ML) was used to lyse the blood cells for 1 min. The lysate was neutralized with PBS in a flow tube. To count the cells, 10 µL of the supernatant was centrifuged at 1800 rpm for 5 min. The samples were then incubated for 10 min with 100 µL of the Fc block and Golgi stop combination. APC bead buffer (65 µL) was added to 100 µL of anti-mouse CD45 APC antibody and incubated for 30 min. iMeg buffer (BD Biosciences, 552362) (1 mL) was added, and the sample was incubated for 8 min. After 4 min of incubation, another 1 mL of iMeg buffer was added to the non-brown region that adhered to the magnetic stand. Using a magnetic support, the liquid was removed from the non-brown zone. Cell subdivision using targeted antibody detection was performed. Before fixing with 2% PFA, 100 µL of the produced antibody was incubated for 30 min. The supernatant was removed, 200µL PBS was added, and flow cytometry was performed.

**Ussing Chamber Intestinal Permeability Assessment**

After longitudinal dilatation of the intestinal section, the waste was carefully removed. The white tank of the instrument contained the intestinal segment with the villous side facing upwards, whereas the second transparent tank enclosed it. Both serosal and mucosal chambers were equipped with two sets of electrodes. The mucosal chamber contained mannitol, whereas the serosal chamber contained glucose. After 800 µL was transported, an equivalent volume of serosal solution was aspirated. The mucosal chamber was then incubated with FITC dextran 4000. The absorbance of 800 µL of serosal solution was measured after 30, 60, and 90 min. Electrodes determined the differences in electrical current between tissue extremities. Using the same voltage and Ohm’s law (V = IR) to calculate the resistance (R), the tissue conductivity (G) was calculated as G = 1/R. High G values indicated severe intestinal barrier degradation.

**Permeability Assay**

The mucosal-to-serosal flux rate of FITC dextran 4000 (44 kDa; Sigma Aldrich, UK) (catalog number: 46944) was used in this assay, and the gut epithelial permeability was determined. After equilibration, 300 µL of 4 kDa FITC dextran was added to the mannitol-Krebs solution. An FITC dextran starting concentration of 1 mg/mL was used. Initial tests revealed that FITC dextran of 4 kDa was not readily detectable in healthy murine tissues. At 0, 30, 60, and 90 min post-luminal addition of FITC dextran, 800 μL samples of serosal buffer were collected and replaced with equal volumes of Krebs buffer/glucose, and fluorescence was measured using TECAN Infinite 200/200 PRO, TECAN Spark. The read emission and fluorescence absorption wavelengths were 488 nm and 520 nm, respectively. The serosal concentrations were determined using a standard curve derived from known concentrations. The paracellular flux was expressed as pmol/cm2/h.

**Bacterial Translocation**

After euthanasia, the spleen and mesenteric lymphoid tissues of the mice were removed and deposited in a microcentrifuge tube with homogenized particles. The net weight of each tissue sample was then determined. For every 0.01 g of tissue weight, 100 µL of sterile PBS solution was added to the tube. The tissues were homogenized using homogenizers. Tissue lysate (200 µL) was distributed on a Scientific Biotech Corporation sheep blood agar plate using a sterile glass rod and the plate was incubated at 37°C overnight. On the following day, bacterial colonies were evaluated.

**BA Analysis**

Following euthanasia, the intestinal contents were transported to Genomics Bioscience Technology Co., Ltd., for liquid chromatography-mass spectrometry BA analysis. Samples (10 mg) were combined with 500 µL of extraction solution containing internal standards (DCA-d6, GCA-d4, and TCDCA-d4). After 4 min of grinding at 2.35 Hz, the samples were vortexed for 30 s. Cold sonication was then performed. After 1 h at -20°C, the mixture was centrifuged for 15 min at 12,000 rpm and 4°C. The analytical vessel received a 200 μL supernatant aliquot. The sample was injected into an ACQUITY UPLC BEH C8 (Waters) (1.7 m*2.1*100 mm) column at 60°C. The target Lynx then combined the signal intensity data with the concentration values.

**GM and Diversity Analysis**

***Fecal DNA Extraction***

Five feces samples per group of 2–3 were collected in 2 mL microcentrifuge tubes after a 20-week HFD. Containers were maintained at -80 °C. Lysate buffer (700 µL) and a pestle were used to homogenize the feces in each collection container. Proteinase K (1 µL) was added and incubated at 65°C in a dry environment overnight. Chloroform (700 µL) was added to each microcentrifuge container and vigorously mixed until the chloroform became transparent and white. After 15 min of centrifugation at 12,000 ×*g*, the aqueous layer was transferred to a new microcentrifuge tube. The sample was then mixed with 700 μL isopropanol, mixed thoroughly, and centrifuged again at 12,000 ×*g* for 10 min. The residue was discarded. Ethanol (70%, 200 µL) was added, the particle gently agitated, and centrifuged for an additional 10 min. This step was repeated 200 µL of 100% ethanol. The stool DNA was air-dried to eliminate the ethanol. Finally, 100 µL of TE buffer was added, and the sample was incubated at room temperature or 37°C dry immersion until the DNA dissolved and stored at -20 °C.

***Full-length 16S Sequencing Analysis***

The concentration and purity of the fecal DNA were determined using a NanoDrop spectrophotometer. After validation by Genomics Bioscience Technology Co., Ltd., the samples were sequenced. Microbes were analyzed using third-generation 16S metagenomic sequencing. Universal primers (27F + 1492R) were used to amplify the 16S genes. After quality control, library construction, DNA purification, and damage restoration, third-generation PacBio sequencing systems were used to generate sequences. ASVs are generated and compared to databases such as NCBI, GreenGenes, and SILVA to determine species and abundance. These analyses included diversity, microbiological composition, functional predictions, and correlation. The cloud platform of Genomics Bioscience Technology Co., Ltd., organized and analyzed the data. In biological datasets, LEfSe is used to filter genomic characteristics and identify high-dimensional biomarkers. LEfSe can be used to identify biomarkers with statistical significance and compare subgroups. Further, it can simultaneously detect species with substantial variations in abundance across taxonomic levels (phylum, class, order, family, and genus). The algorithm places strong emphasis on statistical significance and biological relevance. PICRUSt was used to predict metagenomic functions using marker genes by estimating the functional potential of microbial communities by inferring the presence and abundance of functional genes from marker genes such as 16S rRNA sequences. Welch’s t-test was used to identify distinct species within each taxonomic hierarchy (phylum, class, order, family, genus, and species). Species exhibiting statistically significant differences (P<0.05) were identified, and a bar graph depicting intergroup species differences was generated.

**RNA Extraction from Human PBMCs**

***RNA Quantification and Qualification***

An RNA SimpliNanoTM Spectrophotometer (Biochrom, MA, USA) was used to verify RNA purity and quantity. A Qsep 100 DNA/RNA Analyzer (BiOptic Inc., Taiwan) was used to evaluate RNA degradation and integrity.

***Library Preparation for Transcriptome Sequencing***

Transcriptome sequencing library preparation was performed as follows: RNA sample preparations included 1 μg total RNA per sample. Following the manufacturer’s instructions, sequencing libraries were created using the KAPA mRNA HyperPrep Kit (KAPA Biosystems, Roche, Basel, Switzerland), and index codes were applied to assign sequences to the samples. Magnetic oligo-dT beads were used to isolate mRNA from total RNA. High-temperature incubation with magnesium in the KAPA fragment, priming, and elution buffer (1×) treatment fragmented the captured mRNA. Random hexamer priming produced first-strand cDNA. Combined second strand synthesis and A-tailing converted the cDNA:RNA hybrid to double-stranded cDNA, integrated dUTP into the second strand, and added dAMP to the 3′ ends. dsDNA adapters with 3′ dTMP overhangs were ligated to library insert fragments to create adapter-containing fragments. KAPA Pure Beads (KAPA Biosystems, Roche) were used to purify library fragments to select 300–400 bp cDNA fragments. KAPA HiFi HotStart ReadyMix (KAPA Biosystems) and library amplification primers were used to amplify the library with adapter sequences at both ends. The dUTP-marked strands were not amplified, which enabled strand-specific sequencing. Finally, PCR products were purified using KAPA Pure Beads, and the Qsep 100 DNA/RNA Analyzer (BiOptic Inc., Taiwan) was used to evaluate library quality.

***Data Analysis***

CASAVA base calling converts high-throughput sequencing data (Illumina NovaSeq 6000 platform) into FASTQ-formatted raw sequenced reads. FastQC and MultiQC (1) checked the quality of the FASTQ files. Trimmomatic (v0.38) (2) removed low-quality reads, trimmed adaptor sequences, and removed low-quality bases from the raw paired-end reads: LEADING:3 Trailing:3 SlidingWINDOW:4:15 MINLEN:30. Clean readings were used for the analysis. HISAT2 (v2.1.0) aligned read pairs from each sample to the reference genome (e.g., Homo sapiens, GRCh38) (3, 4). FeatureCounts (v2.0.0) counted gene-mapped reads (5). The "Trimmed Mean of M-values" (TMM) normalization (DEGseq [v1.40.0] (6) without biological duplicate) and "Relative Log Expression" (RLE) normalization (DESeq2 (7, 8) with biological duplicate) were used for gene expression. DEGseq (without biological replicates) and DESeq2 (with biological replicates) were used in R to analyze differentially expressed genes (DEGs) in the two situations (9-11). GO and KEGG pathway (12, 13) clusterProfiler (v3.14.3) enriched DEGs (14). DOSE (15) maps disease ontology (DO) concepts to MeSH, ICD, NCI thesaurus, SNOMED, and OMIM. To discover enriched biological activities and activated pathways from MSigDB, gene set enrichment analysis (GSEA) (16) was performed with 1,000 permutations. MSigDB contains hallmark, positional, curated, motif, computational, GO, oncogenic, and immunological gene sets for GSEA software (17, 18). STRINGDB created a protein-protein interaction (PPI) network of DEGs. The Weighted Gene Co-expression Network Analysis (WGCNA) (v.1.69) in R was used to create a co-expression network based on expression pattern correlations (19, 20).


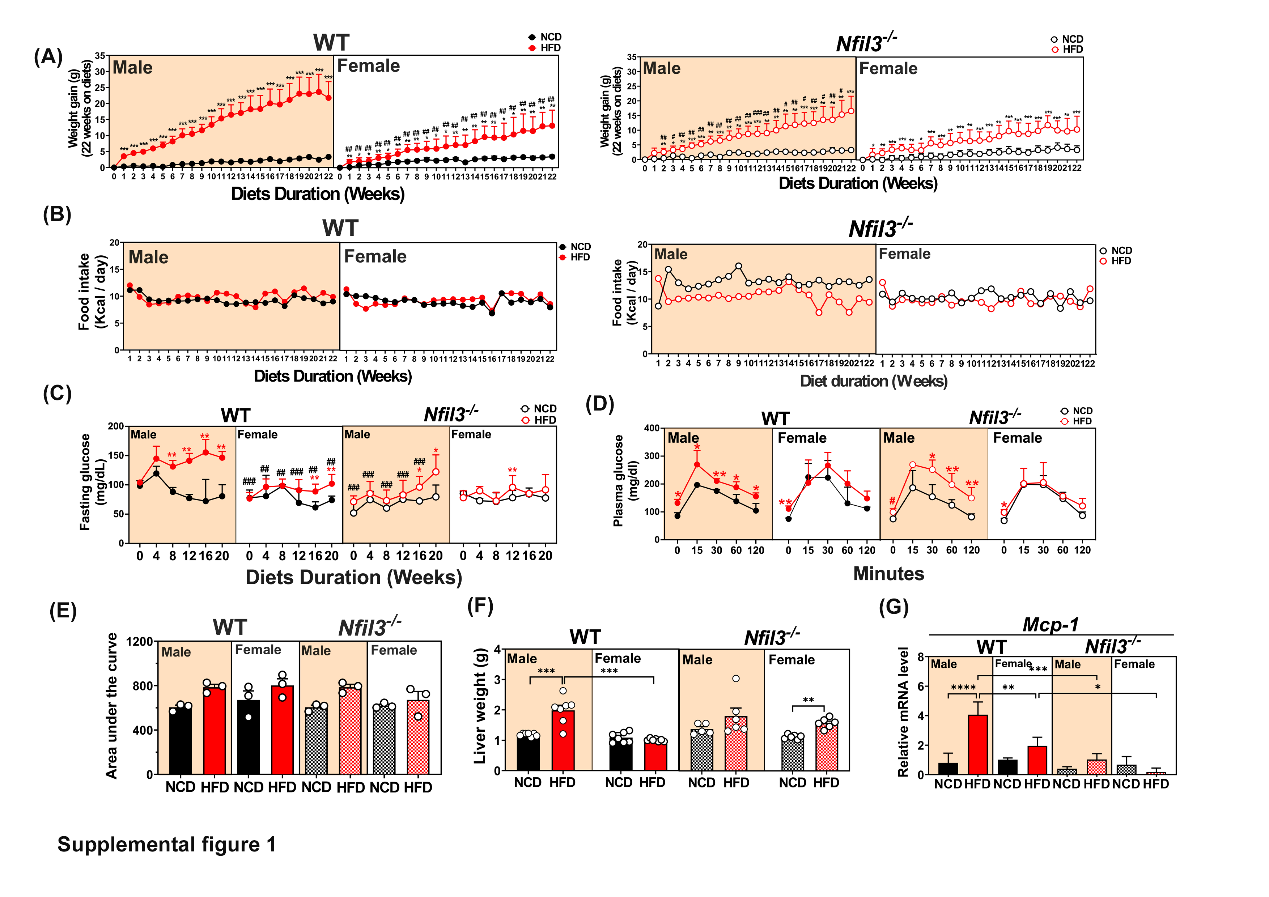


**Supplemental Figure S1. Sex-specific physiology in high-fat diet (HFD)-fed wild type (WT) and *Nfil3*-deficient (NKO) mice.**

**(A)** After 22 weeks of being fed an HFD, male and female NKO mice gained weight weekly (y-axis, grams; x-axis, Diet duration weeks). **(B)** Weekly caloric consumption by male and female WT mice in the NCD and HFD groups. The x-axis shows weeks, and the y-axis shows Kcal/day. Weekly WT mouse caloric consumption statistics. The x-axis shows weeks, and the y-axis shows daily kilocaloric consumption. **(C)** Four-week fasting blood glucose levels in HFD-fed male and female WT and NKO mice. The x-axis shows weeks, whereas the y-axis shows post-fasting blood glucose levels in mg/dL. **(D-E)** Following oral glucose tolerance testing, glucose area under the curves (AUCs) were calculated for male and female NKO mice. Effect of HFD on liver function in male and female WT and NKO mice. Serum liver function indices were evaluated in WT and NKO mice of different sexes after HFD. **(F)** HFD-induced induced weight loss in the liver. **(G)** *MCP-1* gene mRNA expression in livers of HFD-fed male and female WT and NKO mice. The experimental results are presented as the mean ± standard error of the mean (SEM). * P<0.05; ** P<0.01; *** P<0.001; # P<0.05; ## P<0.01; ### P<0.001.


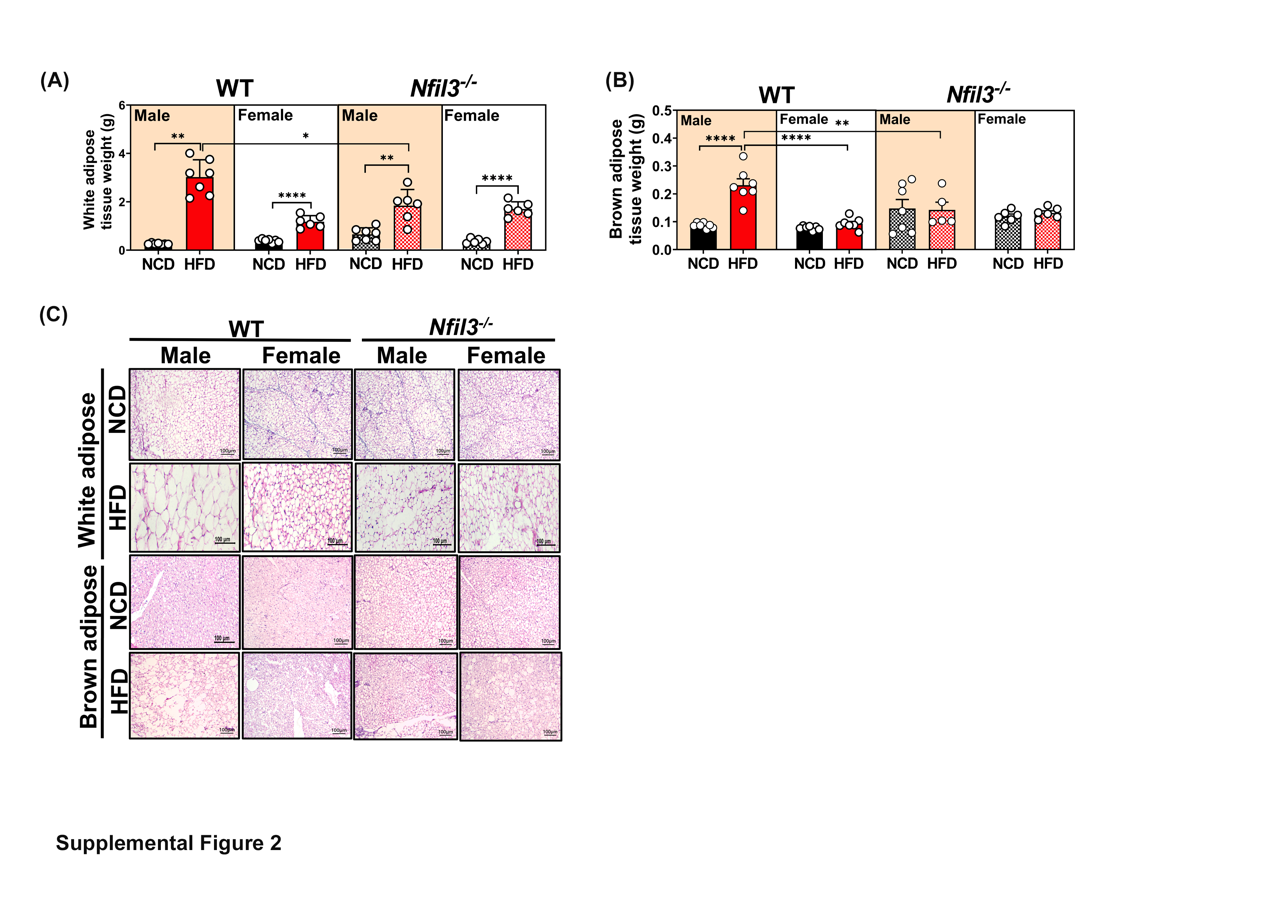


**Supplemental Figure S2. High-fat diet (HFD) effects on adipose tissue shape and weight in male and female wild type (WT) and *Nfil3*-deficient (NKO) mice.**

**(A)** Effect of HFD on white adipose tissue (WAT) weight. **(B)** Brown adipose tissue (BAT) weight change After an HFD feeding. **(C)** Hematoxylin and eosin (H&E) staining of male and female WT and NKO mice fed an HFD to examine structural changes in adipose tissue. Scale bar = 100 μm. The experimental results are presented as the mean ± standard error of the mean (SEM). * Indicates a statistically significant difference from the normal chow diet (NCD) group: * P<0.05; ** P<0.01; *** P<0.001; # P<0.05; ## P<0.01; ### P<0.001.


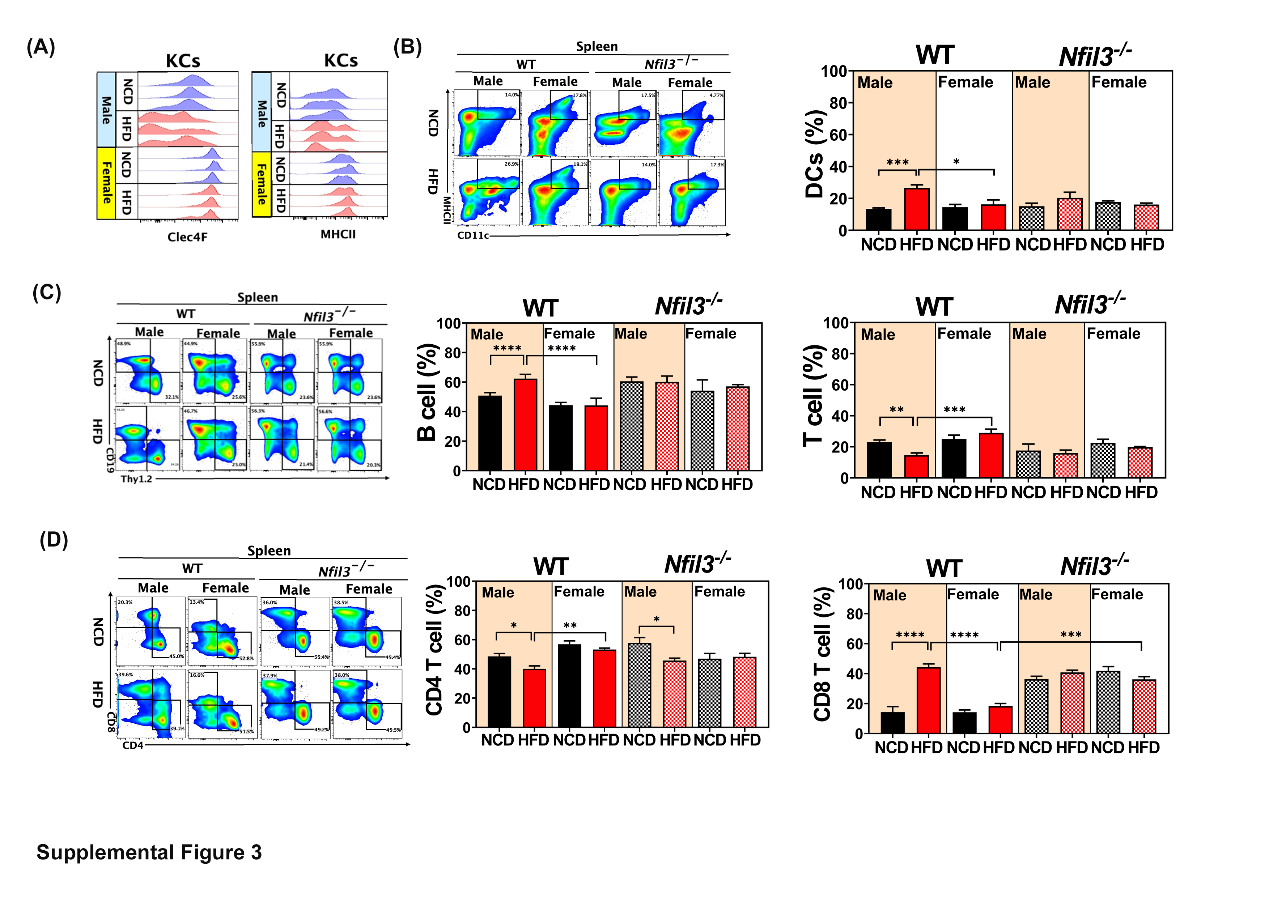


**Supplemental Figure S3. High-fat diet (HFD)-induced changes in the immune profiles of male and female wild type (WT) and *Nfil3*-deficient (NKO) mice.**

**(A)** Flow cytometry detection of Kupffer cell (KC) Clec4f and MHCII expression in the liver. **(B-D)** Percentages describing the expression of markers on dendritic cells (DCs), B cells, T cells, CD4 T cells, and CD8 T cells in the spleen. The experimental results are presented as the mean ± standard error of the mean (SEM). Asterisks denote statistical differences: * P<0.05; ** P<0.01; *** P<0.001; **** P<0.0001.


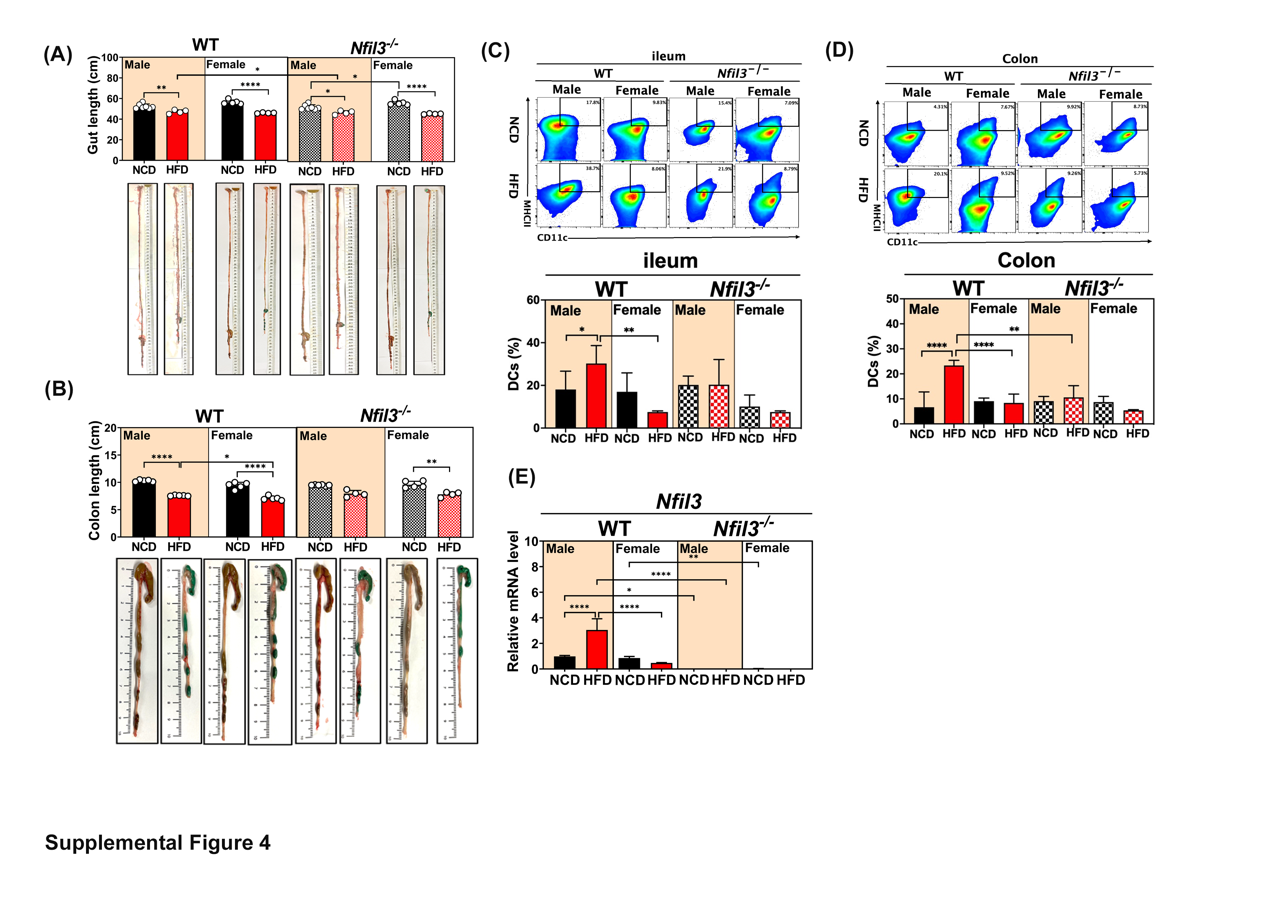


**Supplemental Figure S4. A high-fat diet (HFD) alters the gut length, colon length, and immunological profile of male and female wild type (WT) and *Nfil3*-deficient (NKO) mice.**

**(A-B)** Differences in total gut length and colon length (in cm) between normal chow diet (NCD) and HFD mice euthanized after feeding. The colon, gastrointestinal system, and cecum of each mouse group **(C-D)** Flow cytometry of ileal and colonic dendritic cells (DCs).The experimental results are presented as the mean ± standard error of the mean (SEM). Asterisks denote statistical differences: * P<0.05; ** P<0.01; *** P<0.001; **** P<0.0001.


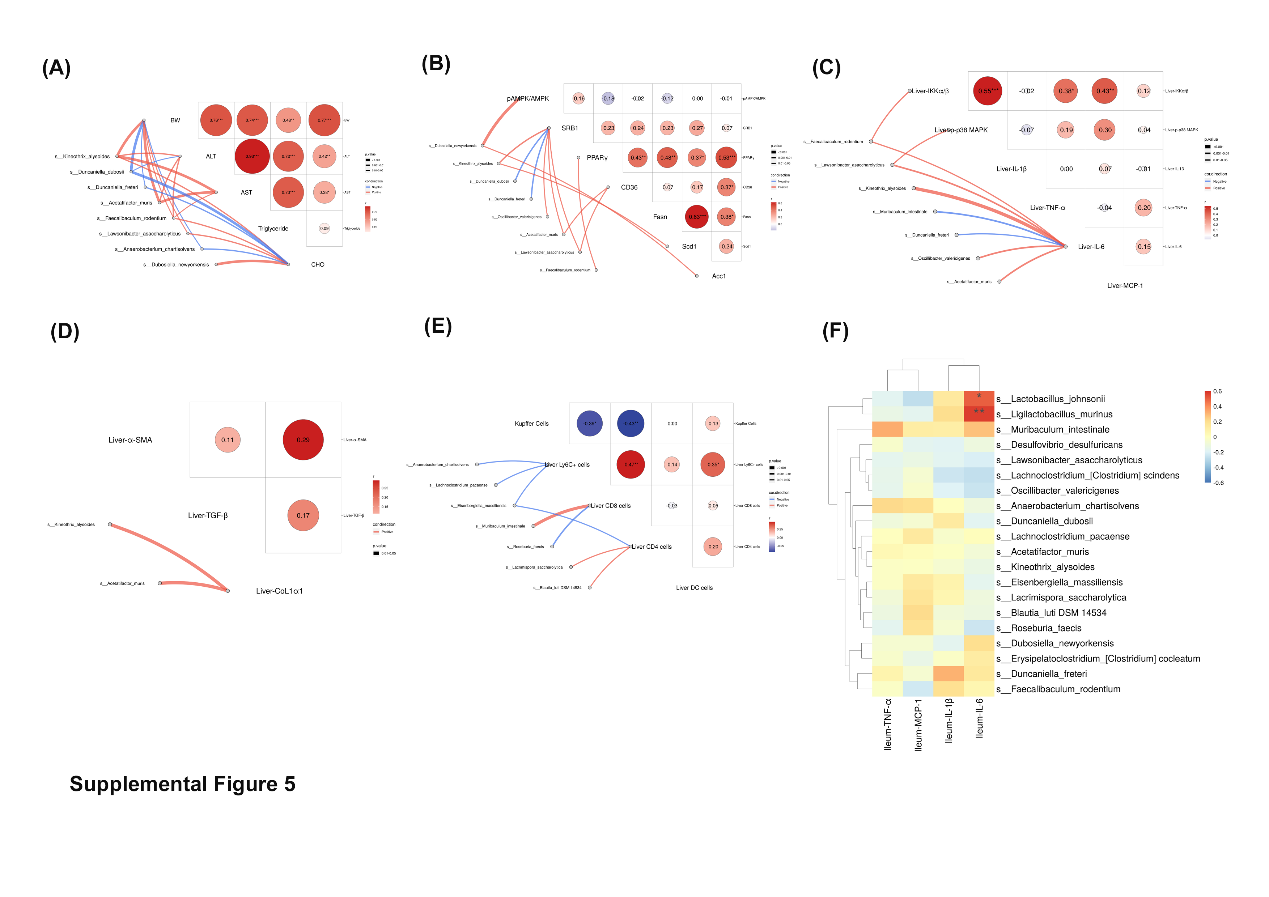


**Supplemental Figure S5. Gut microbiota-bile acid (GM-BA) correlations in high-fat diet (HFD)-fed male and female wild type (WT) and *Nfil3*-deficient (NKO) mice.**

**(A)** PICRUSt-predicted gut microbial function in male mice NKO mice. The serum levels matched those of the top 10 GM species. Positive species-value correlations are shown in red, whereas negative ones are shown in blue. The line width indicates the correlation strength. *Kineothrix alysoides* and *Acetatifactor muris* increased body weight (BW), liver function index, and triglycerides (TG) and cholesterol (CHO) levels in HFD-fed mice. NKO and WT mice exhibited increased and decreased *Muribaculum intestinal* counts, respectively. Gut microbial (GM) species and their serum levels in HFD-fed male and female WT and NKO mice. Red lines represent a positive link between the microbial species and serum values, whereas blue lines indicate a negative correlation. The line width indicates the correlation intensity. *K. alysoides* and *A. muris* were positively correlated with BW gain, liver function, and blood lipids (TG and CHO) in WT-HFD mice. Bacteria such as *M. intestinale*, with an increased abundance compared with that in the WT group following HFD consumption, were negatively correlated in the NKO group. **(B)** The livers of male and female WT and NKO mice fed an HFD revealed relationships between GM species and endogenous lipid synthesis genes or proteins. The graph demonstrates how the top 10 GM species affect endogenous lipid synthesis genes and proteins in the liver. *K. alysoides* and *A. muris* increased *Srb1, Scd1*, and *Cd36* gene expression in WT-HFD mice. After HFD feeding, NKO mice had more *Dubosiella newyorkensis* than WT mice, and the *p-AMPK* and *Acc1* genes were positively correlated. **(C)** Graph showing how the top 10 GM species affect liver proinflammatory factors, inflammatory responses, and fibrosis gene expression. **(D)** In WT-HFD mice, *K. alysoides*, *A. muris*, and *Faecalibaculum* *rodentium* were positively linked with Il-6 or p-IKK/ protein expression. In NKO mice, bacteria, such as *M. intestinale*, with an increased abundance following HFD intake relative to that in the WT group, were negatively correlated with *Il-6* gene expression. *K. alysoides* and *A. muris* were strongly linked with *Col1a1* gene expression. **(E)** The top seven gut bacterial species influencing liver proinflammatory genes and protein expression. NKO mice had more *M. intestinale* and CD8+ T lymphocytes than WT mice after HFD feeding. **(F)** Gene expression of GM species and proinflammatory cytokines in the small intestines of HFD-fed male and female WT and NKO mice. The heatmap shows the top 20 GM and proinflammatory cytokine gene expression. *Lactobacillus johnsonii* and *Ligilactobacillus murinus* increased ileal IL-6 expression.


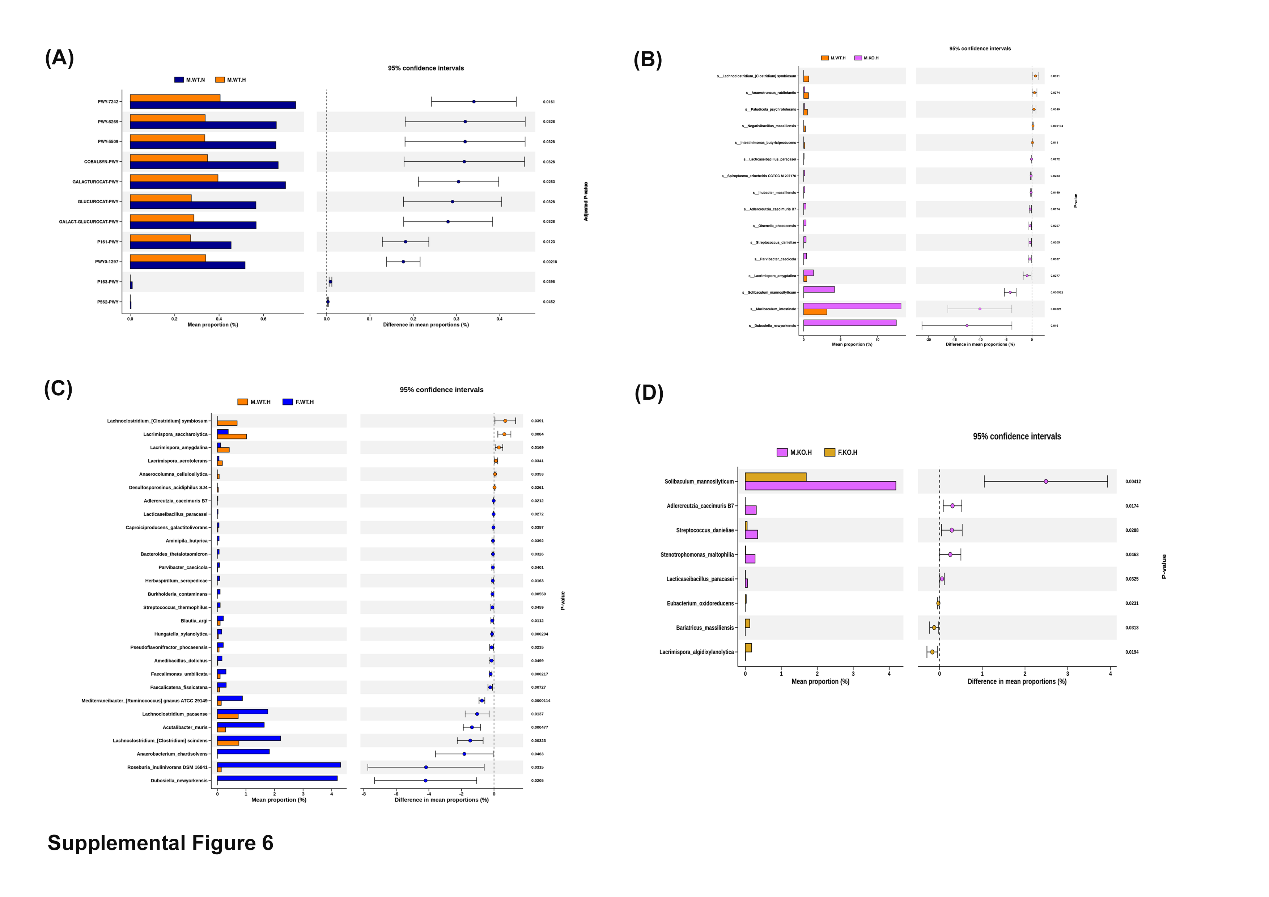


**Supplemental Figure S6. Gut microbiota (GM) in normal chow diet (NCD)/high-fat diet (HFD) male and female wild type (WT) and *Nfil3*-deficient (NKO) mice.**

**(A-D)** The left figure shows the average abundance ratio of the two distinct species groupings. The right-hand chart shows the intergroup confidence interval discrepancies. The leftmost point of each circle represents the lower limit of the 95% confidence interval for the difference in the means, whereas the rightmost point represents the upper limit. The center of the circle indicates the mean difference. Circles indicate the higher-mean group. Statistical significance was set at P<0.05.


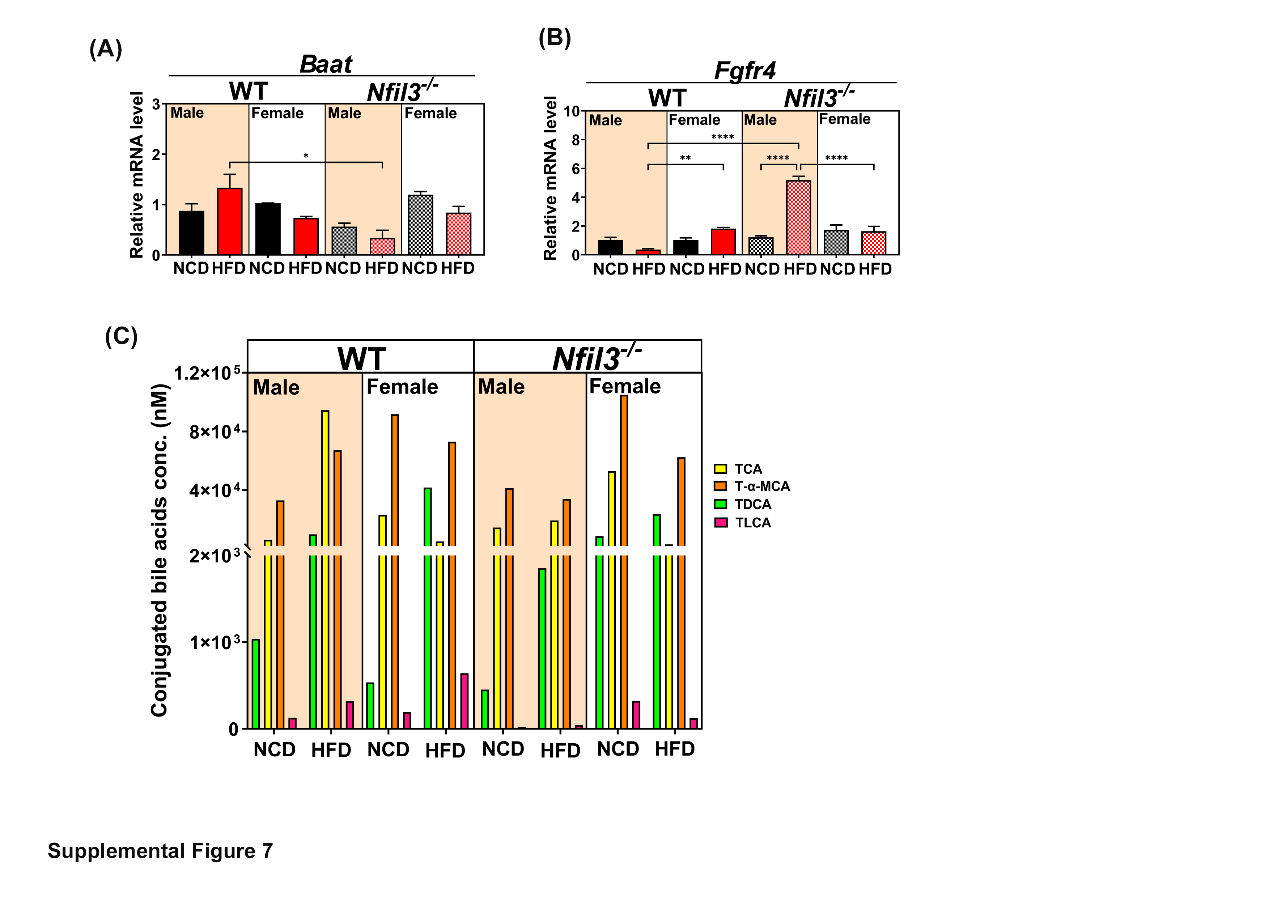


**Supplemental Figure S7. Ileal bile acid (BA) transfer in high-fat diet (HFD)-fed male and female wild type (WT) and *Nfil3*-deficient (NKO) mice.**

**(A-B)** After HFD intake, WT and NKO mice showed different ileal *Baat* and *Fgfr4* expression levels. **(C)** Taurocholic acid (TCA), tauro-muricholic acid (T-MCA), taurodeoxycholic acid (TDCA), and taurolithocholic acid (TLCA) concentrations.

**Reference**

1. Ewels P, Magnusson M, Lundin S, Kaller M. MultiQC: summarize analysis results for multiple tools and samples in a single report. Bioinformatics 2016;32:3047-3048.

2. Bolger AM, Lohse M, Usadel B. Trimmomatic: a flexible trimmer for Illumina sequence data. Bioinformatics 2014;30:2114-2120.

3. Kim D, Langmead B, Salzberg SL. HISAT: a fast spliced aligner with low memory requirements. Nat Methods 2015;12:357-360.

4. Sahraeian SME, Mohiyuddin M, Sebra R, Tilgner H, Afshar PT, Au KF, Bani Asadi N, et al. Gaining comprehensive biological insight into the transcriptome by performing a broad-spectrum RNA-seq analysis. Nat Commun 2017;8:59.

5. Liao Y, Smyth GK, Shi W. featureCounts: an efficient general purpose program for assigning sequence reads to genomic features. Bioinformatics 2014;30:923-930.

6. Wang L, Feng Z, Wang X, Wang X, Zhang X. DEGseq: an R package for identifying differentially expressed genes from RNA-seq data. Bioinformatics 2010;26:136-138.

7. Love MI, Huber W, Anders S. Moderated estimation of fold change and dispersion for RNA-seq data with DESeq2. Genome Biol 2014;15:550.

8. Schurch NJ, Schofield P, Gierlinski M, Cole C, Sherstnev A, Singh V, Wrobel N, et al. How many biological replicates are needed in an RNA-seq experiment and which differential expression tool should you use? RNA 2016;22:839-851.

9. Anders S, McCarthy DJ, Chen Y, Okoniewski M, Smyth GK, Huber W, Robinson MD. Count-based differential expression analysis of RNA sequencing data using R and Bioconductor. Nat Protoc 2013;8:1765-1786.

10. Li B, Dong C, Li P, Ren Z, Wang H, Yu F, Ning C, et al. Identification of candidate genes associated with porcine meat color traits by genome-wide transcriptome analysis. Sci Rep 2016;6:35224.

11. Maza E. In Papyro Comparison of TMM (edgeR), RLE (DESeq2), and MRN Normalization Methods for a Simple Two-Conditions-Without-Replicates RNA-Seq Experimental Design. Front Genet 2016;7:164.

12. Kanehisa M, Araki M, Goto S, Hattori M, Hirakawa M, Itoh M, Katayama T, et al. KEGG for linking genomes to life and the environment. Nucleic Acids Res 2008;36:D480-484.

13. Kanehisa M, Sato Y, Furumichi M, Morishima K, Tanabe M. New approach for understanding genome variations in KEGG. Nucleic Acids Res 2019;47:D590-D595.

14. Yu G, Wang LG, Han Y, He QY. clusterProfiler: an R package for comparing biological themes among gene clusters. OMICS 2012;16:284-287.

15. Yu G, Wang LG, Yan GR, He QY. DOSE: an R/Bioconductor package for disease ontology semantic and enrichment analysis. Bioinformatics 2015;31:608-609.

16. Subramanian A, Tamayo P, Mootha VK, Mukherjee S, Ebert BL, Gillette MA, Paulovich A, et al. Gene set enrichment analysis: a knowledge-based approach for interpreting genome-wide expression profiles. Proc Natl Acad Sci U S A 2005;102:15545-15550.

17. Liberzon A, Birger C, Thorvaldsdottir H, Ghandi M, Mesirov JP, Tamayo P. The Molecular Signatures Database (MSigDB) hallmark gene set collection. Cell Syst 2015;1:417-425.

18. Liberzon A, Subramanian A, Pinchback R, Thorvaldsdottir H, Tamayo P, Mesirov JP. Molecular signatures database (MSigDB) 3.0. Bioinformatics 2011;27:1739-1740.

19. Langfelder P, Horvath S. WGCNA: an R package for weighted correlation network analysis. BMC Bioinformatics 2008;9:559.

20. Zhang B, Horvath S. A general framework for weighted gene co-expression network analysis. Stat Appl Genet Mol Biol 2005;4:Article17.
