# Supplementary material for: Nuclear factor interleukin 3 and metabolic dysfunction-associated fatty liver disease development
Source: Research Square preprint supplement (doi:10.21203/rs.3.rs-3266425/v1), 2023-09-18
Supplement: Supplementary file 2 [file fc9b3dd59e770965e1958202.docx]

**Table S1: Primer sequences for real-time polymerase chain expression used in the study**

| **Primer** | **Sequence** |
| --- | --- |
| *Nfil3* | Forward: CAGGACTACCAGACATCCAAGG  Reverse: AGGACACCTCTGACACATCGGA |
| *Gapdh* | Forward: TGTGTCCGTCGTGGATCTGA  Reverse: TTGCTGTTGAAGTCGCAGGAG |
| *Tnf-α* | Forward: ACGGCATGGATCTCAAAGAC  Reverse: GTGGGTGAGGAGCACGTAGT |
| *Il-1β* | Forward: TCTGAAGCAGCTATGGCAAC  Reverse: ATGAGTTGGGGACTCTCTGG |
| *Il-6* | Forward: TAGTCCTTCCTACCCCAATTTCC  Reverse: TTGGTCCTTAGCCACTCCTTCC |
| *Mcp-1* | Forward: CCCCAAGAAGGAATGGGTCC  Reverse: GTGCTGAAGACCTTAGGGCA |
| *α-sma* | Forward: GGCTCTGGGCTCTGTAAGG  Reverse: CTCTTGCTCTGGGCTTCATC |
| *Col1a1* | Forward: CCAAGGGTAACAGCGGTGAA  Reverse: CCTCGTTTTCCTTCTTCTCCG |
| *Tgf-β1* | Forward: GGTTCATGTCATGGATGGTGC  Reverse: TGACGTCACTGGAGTTGTACGG |
| *Shp* | Forward: TCTCTTCTTCCGCCCTATCA  Reverse: AAGGGCTTGCTGGACAGTTA |
| *Fxr* | Forward: CAAAATGACTCAGGAGGAGTACG  Reverse: GCCTCTCTGTCCTTGATGTATTG |
| *Bacs* | Forward: GTG GGT GAA ATC CTG CGG TA  Reverse: GAC CAA AGC GTT GCT GGA AG |
| *Baat* | Forward: GGAAACCTGTTAGTTCTCAGGC  Reverse: GTGGACCCCCATATAGTCTCC |
| *Ntcp* | Forward: ATGACCACCTGCTCCAGCTT  Reverse: GCCTTTGTAGGGCACCTTGT |
| *Oatp* | Forward: CAGTCTTACGAGTGTGCTCCAGAT  Reverse: ATGAGGAATACTGCCTCTGAAGTG |
| *Ostα* | Forward: TGTTCCAGGTGCTTGTCATCC  Reverse: CCACTGTTAGCCAAGATGGAGAA |
| *Ostβ* | Forward: GATGCGGCTCCTTGGAATTA  Reverse: GGAGGAACATGCTTGTCATGAC |
| *Asbt* | Forward: CTT CTC CCC CGA GGA TCT CA Reverse: TGA TGG CCT GGA GTC CAT TTC |
| *Fgfr4* | Forward: ATT CCT GGC TCT TCG GCC C  Reverse: CAG ACT TCC CAC TGA CCA CC |
| *Fgf15* | Forward: ACG GCA AGA TAT ACG GGC TG  Reverse: GGC TTG GCC TGG ATG AAG AT |
| *Cyp7a1* | Forward: CCT CTG GGC ATC TCA AGC AA  Reverse: AAT GGC ATT CCC TCC AGA GC |
| *Cd36* | Forward: CCAAGCTATTGCGACATGATT  Reverse: CCGAACCACAGCGTAGATAGACC |
| *Fasn* | Forward: TTGGCCCAGAACTCCTGTAG  Reverse: CTCGCTTGTCGTCTGCCT |
| *Acc1* | Forward: GAAGCCACAGTGAAATCTCG  Reverse: GATGGTTTGGCCTTTCACAT |
| *Scd1* | Forward: GCCGAGCCTTGTAAGTTCTG  Reverse: CCTCCTGCAAGCTCTACACC |
| *Occludin* | Forward: ACGGACCCTGACCACTATGA  Reverse: TCAGCAGCAGCCATGTACTC |
| *Zo-1* | Forward: GGGGCCTACACTGATCAAGA  Reverse: TGGAGATGAGGCTTCTGCTT |
